# Supplementary material for: Calcineurin inhibition enhances Caenorhabditis elegans lifespan by defecation defects-mediated calorie restriction and nuclear hormone signaling
Source: eLife. 2024 Nov 1;12:RP89572. doi: 10.7554/eLife.89572 (PMC11530235; doi:10.7554/eLife.89572)
Supplement: Figure 1—figure supplement 1—source data 1. [file elife-89572-fig1-figsupp1-data1.xlsx]

## Sheet: Fig 1-fig. S1
	Experiment #	Strain	Genotype	RNAi	Mean survival	# Deaths/total before censoring	Control for comparison	p value with respect to control	% Survival extension (compared to control)
	1	N2	wild type	EV	65.5	73/87
		N2	wild type	tax-6	21.4	82/87	EV	<0.0001	-67.32
		N2	wild type	crh-1	51.13	69/89	EV	0.0027	-21.94
		N2	wild type	crtc-1	51.13	75/88	EV	0.0045	-21.94
	2	N2	wild type	EV	69.68	67/87
		N2	wild type	tax-6	18.96	83/90	EV	<0.0001	-72.78
		N2	wild type	crh-1	54	81/92	EV	<0.0001	-22.5
		N2	wild type	crtc-1	48	84/88	EV	<0.0001	-31.11
	3	N2	wild type	EV	61.7	74/88
		N2	wild type	tax-6	19.7	78/90	EV	<0.0001	-68.07
		N2	wild type	crh-1	46.7	79/90	EV	0.0003	-24.31
		N2	wild type	crtc-1	53.76	81/88	EV	0.0095	-12.86
