# Supplementary material for: Calcineurin inhibition enhances Caenorhabditis elegans lifespan by defecation defects-mediated calorie restriction and nuclear hormone signaling
Source: eLife. 2024 Nov 1;12:RP89572. doi: 10.7554/eLife.89572 (PMC11530235; doi:10.7554/eLife.89572)
Supplement: Figure 1—figure supplement 2—source data 1. [file elife-89572-fig1-figsupp2-data1.xlsx]

## Sheet: Fig1_fig S2_A
	Experiment #	Strain	Genotype	RNAi	Mean survival	# Deaths/total before censoring	Control for comparison	p value with respect to control	% Survival extension (compared to control)
	1	KU25	pmk-1(km25)	EV	41.7	98/105
		KU25	pmk-1(km25)	tax-6	6.77	104/105	EV	<0.0001	-83.76
	2	KU25	pmk-1(km25)	EV	34.11	98/106
		KU25	pmk-1(km25)	tax-6	6	103/105	EV	<0.0001	-82.4
	3	KU25	pmk-1(km25)	EV	35.7	91/106
		KU25	pmk-1(km25)	tax-6	5.1	97/104	EV	<0.0001	-85.71

## Sheet: Fig1_fig S2_B
	Experiment #	Strain	Genotype	RNAi	Mean survival	# Deaths/total before censoring	Control for comparison	p value with respect to control	% Survival extension (compared to control)
	1	KU21	kgb-1(km21)	EV	29.44	90/106
		KU21	kgb-1(km21)	tax-6	17.4	54/105	EV	<0.0001	-40.89
	2	KU21	kgb-1(km21)	EV	37.55	78/105
		KU21	kgb-1(km21)	tax-6	17.44	95/105	EV	<0.0001	-53.55
	3	KU21	kgb-1(km21)	EV	36.16	89/105
		KU21	kgb-1(km21)	tax-6	16.94	70/105	EV	<0.0001	-53.15

## Sheet: Fig1_fig S2_C
	Experiment #	Strain	Genotype	RNAi	Mean survival	# Deaths/total before censoring	Control for comparison	p value with respect to control	% Survival extension (compared to control)
	1	NU3	dbl-1(nk3)	EV	36.38	82/103
		NU3	dbl-1(nk3)	tax-6	18.33	98/106	EV	<0.0001	-49.61
	2	NU3	dbl-1(nk3)	EV	41.72	71/105
		NU3	dbl-1(nk3)	tax-6	23.22	88/105	EV	<0.0001	-44.34
	3	NU3	dbl-1(nk3)	EV	44.278	83/105
		NU3	dbl-1(nk3)	tax-6	24.3	96/105	EV	<0.0001	-45.11

## Sheet: Fig1_fig S2_D
	Experiment #	Strain	Genotype	RNAi	Mean survival	# Deaths/total before censoring	Control for comparison	p value with respect to control	% Survival extension (compared to control)
	1	VC3056	zip-2(ok3730)	EV	53	80/106
		VC3056	zip-2(ok3730)	tax-6	33.16	57/106	EV	<0.0001	-37.43
	2	VC3056	zip-2(ok3730)	EV	55.6	104/112
		VC3056	zip-2(ok3730)	tax-6	28.77	60/105	EV	<0.0001	-48.25
	3	VC3056	zip-2(ok3730)	EV	51.9	97/105
		VC3056	zip-2(ok3730)	tax-6	30.38	92/105	EV	<0.0001	-41.46

## Sheet: Fig1_fig S2_E
	Experiment #	Strain	Genotype	RNAi	Mean survival	# Deaths/total before censoring	Control for comparison	p value with respect to control	% Survival extension (compared to control)
	1	CF1038	daf-16(mu86)	EV	41.944	83/106
		CF1038	daf-16(mu86)	tax-6	21.11	83/106	EV	<0.0001	-49.67
	2	CF1038	daf-16(mu86)	EV	44	87/106
		CF1038	daf-16(mu86)	tax-6	22.5	93/105	EV	<0.0001	-48.86
	3	CF1038	daf-16(mu86)	EV	45.66	92/105
		CF1038	daf-16(mu86)	tax-6	26.44	79/105	EV	<0.0001	-42.09
