# Supplementary material for: Calcineurin inhibition enhances Caenorhabditis elegans lifespan by defecation defects-mediated calorie restriction and nuclear hormone signaling
Source: eLife. 2024 Nov 1;12:RP89572. doi: 10.7554/eLife.89572 (PMC11530235; doi:10.7554/eLife.89572)
Supplement: Figure 1—source data 1. [file elife-89572-fig1-data1.xlsx]

## Sheet: 1A
	Experiment #	Strain	Genotype	Mean survival	# Deaths/total before censoring	Control for comparison	p value with respect to control	% Survival extension (compared to control)
	1	N2	wild type	53.3	82/91
		PR675	tax-6(p675)	18.8	86/88	N2	<0.0001	-64.72
	2	N2	wild type	62.2	74/79
		PR675	tax-6(p675)	20.8	90/90	N2	<0.0001	-66.55
	3	N2	wild type	58.1	86/86
		PR675	tax-6(p675)	31.5	83/90	N2	<0.0001	-45.78

## Sheet: 1B
	Experiment #	Strain	Genotype	Mean survival	# Deaths/total before censoring	Control for comparison	p value with respect to control	% Survival extension (compared to control)
	1	N2	wild type	52.2	90/91
		RB1667	tax-6(ok2065)	40.87	91/91	N2	<0.0001	-21.7
	2	N2	wild type	50	88/90
		RB1667	tax-6(ok2065)	41.1	90/91	N2	<0.0001	-17.8
	3	N2	wild type	52.43	87/90
		RB1667	tax-6(ok2065)	39.48	92/93	N2	<0.0001	-24.7

## Sheet: 1C
	Experiment #	Strain	Genotype	RNAi	Mean survival	# Deaths/total before censoring	Control for comparison	p value with respect to control	% Survival extension (compared to control)	Remarks
	1	N2	wild type	EV	66.5	84/105
		N2	wild type	tax-6	30.6	61/104	EV	<0.0001	-53.98
	2	N2	wild type	EV	68.8	74/93
		N2	wild type	tax-6	32.5	48/97	EV	<0.0001	-52.76
	3	N2	wild type	EV	65.5	73/87				common with figure 1_figure supplement 1
		N2	wild type	tax-6	21.4	82/87	EV	<0.0001	-67.32

## Sheet: 1D
	Experiment #	Strain	Genotype	RNAi	Mean survival	# Deaths/total before censoring	Control for comparison	p value with respect to control	% Survival extension (compared to control)
	1	PR675	tax-6(p675)	EV	25.5	71/105
		PR675	tax-6(p675)	tax-6	21.1	85/105	EV	0.0015	-17.25
	2	PR675	tax-6(p675)	EV	25.278	124/150
		PR675	tax-6(p675)	tax-6	26.2	96/150	EV	0.0326	3.647
	3	PR675	tax-6(p675)	EV	25.778	103/150
		PR675	tax-6(p675)	tax-6	25.778	107/150	EV	0.7609	0

## Sheet: 1E
	Experiment #	Strain	Genotype	RNAi	Mean survival	# Deaths/total before censoring	Control for comparison	p value with respect to control	% Survival extension (compared to control)
	1	N2	wild type	EV	14	164/164
		N2	wild type	tax-6	28.5	141/141	EV	<0.0001	103.6
	2	N2	wild type	EV	14.69	224/224
		N2	wild type	tax-6	28.47	222/222	EV	<0.0001	93.8
	3	N2	wild type	EV	12.4	158/158
		N2	wild type	tax-6	23.3	72/72	EV	<0.0001	87.9

## Sheet: 1F
	Experiment #	Strain	Genotype	Mean survival	# Deaths/total before censoring	Control for comparison	p value with respect to control	% Survival extension (compared to control)	Remarks
	1	N2	wild type	12.8	90/90
		PR675	tax-6(p675)	17	64/64	N2	<0.0001	32.81
		RB1667	tax-6(ok2065)	21	94/94	N2	<0.0001	64
	2	N2	wild type	14.4	108/108
		PR675	tax-6(p675)	18.5	88/88	N2	<0.0001	28.47
		RB1667	tax-6(ok2065)	21	86/86	N2	<0.0001	45.83
	3	N2	wild type	13.6	120/120
		PR675	tax-6(p675)	15.4	103/103	N2	0.0001	13.23
		RB1667	tax-6(ok2065)	28.1	93/93	N2	<0.0001	106.6

## Sheet: 1G
	Experiment #	Strain	Genotype	RNAi	Mean survival	# Deaths/total before censoring	Control for comparison	p value with respect to control	% Survival extension (compared to control)
	1	HH142	fer-1(b232)	EV	87	87/105
		HH142	fer-1(b232)	tax-6	47.86	71/105	EV	<0.0001	-44.98
	2	HH142	fer-1(b232)	EV	74.4	78/105
		HH142	fer-1(b232)	tax-6	46.38	81/150	EV	<0.0001	-37.66
	3	HH142	fer-1(b232)	EV	68.9	77/120
		HH142	fer-1(b232)	tax-6	47.7	71/150	EV	<0.0001	-30.76

## Sheet: 1H
	Experiment #	Strain	Genotype	RNAi	Mean survival	# Deaths/total before censoring	Control for comparison	p value with respect to control	% Survival extension (compared to control)
	1	HH142	fer-1(b232)	EV	8.84	98/100
		HH142	fer-1(b232)	tax-6	13.3	90/98	EV	<0.0001	50.45
	2	HH142	fer-1(b232)	EV	8.7	97/100
		HH142	fer-1(b232)	tax-6	12.75	98/100	EV	<0.0001	46.55
	3	HH142	fer-1(b232)	EV	7.8	92/100
		HH142	fer-1(b232)	tax-6	11.75	100/100	EV	<0.0001	50.64
