# Supplementary material for: Calcineurin inhibition enhances Caenorhabditis elegans lifespan by defecation defects-mediated calorie restriction and nuclear hormone signaling
Source: eLife. 2024 Nov 1;12:RP89572. doi: 10.7554/eLife.89572 (PMC11530235; doi:10.7554/eLife.89572)
Supplement: Figure 2—figure supplement 1—source data 1. [file elife-89572-fig2-figsupp1-data1.xlsx]

## Sheet: Fig2_Fig S1_B
		CFU/animal
		N2	tax-6(ok2065)
		27000	167500
		26500	207500
		9750	147500
	Mean	21083.3	174167
	Std. Deviation	9818	30551
