# Supplementary material for: Calcineurin inhibition enhances Caenorhabditis elegans lifespan by defecation defects-mediated calorie restriction and nuclear hormone signaling
Source: eLife. 2024 Nov 1;12:RP89572. doi: 10.7554/eLife.89572 (PMC11530235; doi:10.7554/eLife.89572)
Supplement: Figure 2—figure supplement 2—source data 1. [file elife-89572-fig2-figsupp2-data1.xlsx]

## Sheet: Fig 2_fig S2_A
		Pharyngeal pumps/30s
		N2
		EV	tax-6 RNAi
		147	144
		140	159
		146	151
		150	147
		151	157
		153	152
		159	151
		141	146
		161	130
		148	147
		141	128
		132	130
		136	131
		132	127
		137	130
		134	127
		127	132
		133	120
		130	124
		133	122
	Mean	141.6	137.8
	Std. Deviation	9.87	12.55

## Sheet: Fig 2_fig S2_B
		Number of expulsions/20 minutes
		N2	tax-6(p675)
			regular	irregular
		16	13	2
		18	18	0
		18	13	5
		17	19	3
		18	20	6
	Mean	17.33	16.17	3.333
	Std. Deviation	0.8165	3.189	2.16
