# Supplementary material for: Calcineurin inhibition enhances Caenorhabditis elegans lifespan by defecation defects-mediated calorie restriction and nuclear hormone signaling
Source: eLife. 2024 Nov 1;12:RP89572. doi: 10.7554/eLife.89572 (PMC11530235; doi:10.7554/eLife.89572)
Supplement: Figure 2—source data 1. [file elife-89572-fig2-data1.xlsx]

## Sheet: 2B
		CFU/animal
		N2
		EV	tax-6 RNAi
		19500	1600000
		49000	800000
		16000	1070000
	Mean	28167	1156667
	Std. Deviation	18127	406981

## Sheet: 2D
		CFU/animal
		N2	tax-6(p675)
		13000	625000
		13500	190000
		39500	380000
	Mean	22000	398333
	Std. Deviation	15158	218079

## Sheet: 2F
		Lumen diameter (μm)
		N2
		EV	tax-6 RNAi
		7.067	29.47
		5.89	29.47
		10.6	29.448
		11.6	25.373
		5.89	33
		4.857	40.2
		10.6	33.316
		13	28.294
		7.4	23.558
		8.5	38.996
		17.6	36.534
		7.9	24.7
		7.06	18.883
		14.13	24.987
		4.7	21.7
		5.8	27.5
		14.13	22.7
		8.329	17.9
		10.6	38.8
		9.49	36.5
		9.7	23.6
	Mean	9.278	28.81
	Std. Deviation	3.416	6.696

## Sheet: 2G
		Number of expulsions/20 minutes
		N2
		EV	tax-6 RNAi
		20	4
		17	5
		18	5
		19	3
		20	0
		18	1
	Mean	18.67	3
	Std. Deviation	1.211	2.098

## Sheet: 2H
		Worms with irregular DMP(%)
		N2	tax-6(p675)
		0	34.78
		0	37.5
		0	35.08
		0	37.5
	Mean	0	36.22
	Std. Deviation	0	1.489
