# Supplementary material for: Calcineurin inhibition enhances Caenorhabditis elegans lifespan by defecation defects-mediated calorie restriction and nuclear hormone signaling
Source: eLife. 2024 Nov 1;12:RP89572. doi: 10.7554/eLife.89572 (PMC11530235; doi:10.7554/eLife.89572)
Supplement: Figure 3—figure supplement 3—source data 1. [file elife-89572-fig3-figsupp3-data1.xlsx]

## Sheet: Fig 3_S3_B
		CFU/animal
		N2	clk-1(qm30)
		13750	2925
		7000	1650
		20500	3050
	Mean	13750	2542
	Std. Deviation	6750	774.7

## Sheet: Fig 3_S3_D
			CFU/animal
			N2	isp-1(qm150)
			8500	3825
			7750	1300
			9000	2825
		Mean	8417	2650
		Std. Deviation	629.2	1272

## Sheet: Fig 3_S3_E
	Experiment #	Strain	Genotype	Mean survival	# Deaths/total before censoring	Control for comparison	p value with respect to control	% Survival extension (compared to control)
	1	N2	wild type	45.36	87/90
		MQ130	clk-1(qm30)	46.74	90/91	N2	0.0643	3.04
	2	N2	wild type	46.26	84/90
		MQ130	clk-1(qm30)	49.33	90/90	N2	0.0572	6.63
	3	N2	wild type	53.2	86/90
		MQ130	clk-1(qm30)	55.4	87/90	N2	0.1948	4.13

## Sheet: Fig 3_S3_F
	Experiment #	Strain	Genotype	Mean survival	# Deaths/total before censoring	Control for comparison	p value with respect to control	% Survival extension (compared to control)
	1	N2	wild type	47.3	95/95
		MQ887	isp-1(qm150)	53.17	88/93	N2	<0.0001	12.41
	2	N2	wild type	61.3	89/90
		MQ887	isp-1(qm150)	57.8	81/90	N2	0.0067	-6.52
	3	N2	wild type	55.52	90/90
		MQ887	isp-1(qm150)	54.32	86/90	N2	0.1152	-2.16

## Sheet: Fig 3_S3_G
Experiment #	Strain	Genotype	RNAi	Mean survival	# Deaths/total before censoring	Control for comparison	p value with respect to control	% Survival extension (compared to control)
1	N2	wild type	EV	43.5	103/106
	N2	wild type	flr-1	29.7	100/106	EV	<0.0001	-31.72
	N2	wild type	pbo-1	24.5	105/105	EV	<0.0001	-43.6
	N2	wild type	nhx-2	29.8	99/105	EV	<0.0001	-31.5
2	N2	wild type	EV	45	91/92
	N2	wild type	flr-1	31.82	89/90	EV	<0.0001	-29.28
	N2	wild type	pbo-1	34.26	90/90	EV	<0.0001	-23.88
	N2	wild type	nhx-2	30.9	90/90	EV	<0.0001	-31.33
3	N2	wild type	EV	50.3	90/90
	N2	wild type	flr-1	31.77	90/90	EV	<0.0001	-36.83
	N2	wild type	pbo-1	31	90/90	EV	<0.0001	-38.36
	N2	wild type	nhx-2	33.16	91/91	EV	<0.0001	-34.07
