# Supplementary material for: Calcineurin inhibition enhances Caenorhabditis elegans lifespan by defecation defects-mediated calorie restriction and nuclear hormone signaling
Source: eLife. 2024 Nov 1;12:RP89572. doi: 10.7554/eLife.89572 (PMC11530235; doi:10.7554/eLife.89572)
Supplement: Figure 3—source data 1. [file elife-89572-fig3-data1.xlsx]

## Sheet: 3C
Time(minutes)	Percent with blue dye_N2			Percent with blue dye_tax-6(ok2065)
	Set 1	Set 2	Set 3	Set 1	Set 2	Set 3
0	100	100	100	100	100	100
5	74	84	100	100	100	100
10	44.4	36	80	100	100	100
15	33.33	12	28	100	100	92
20	11.1	4	16	96.29	88	80
25	11.1	0	4	66.66	60	56
30	7.4	0	4	51.85	48	52
35	3.7	0	4	33.33	40	36
40	3.7	0	0	29.62	24	24
45	3.7	0	0	25.92	20	24
50	0	0	0	18.5	16	16
55				18.5	16	4
60				0	16	4

## Sheet: 3D
Time(minutes)	Percent N2 worms with blue dye_EV			Percent N2 worms with blue dye_tax-6 RNAi
0	100	100	100	100	100	100
5	100	96	100	100	100	100
10	92	84	96	100	100	100
15	84	80	88	100	100	100
20	52	68	56	100	96	96
25	24	24	40	100	92	92
30	12	16	12	100	84	76
35	12	8	4	96	64	72
40	12	0	0	96	48	64
45	12	0	0	88	48	52
50	0	0	0	76	36	40
55				64	36	36
60				60	28	28
