# Supplementary material for: Calcineurin inhibition enhances Caenorhabditis elegans lifespan by defecation defects-mediated calorie restriction and nuclear hormone signaling
Source: eLife. 2024 Nov 1;12:RP89572. doi: 10.7554/eLife.89572 (PMC11530235; doi:10.7554/eLife.89572)
Supplement: Figure 4—source data 1. [file elife-89572-fig4-data1.xlsx]

## Sheet: 4B
		Oil-Red-O intensity/animal
		N2
		EV	tax-6 RNAi
		87.277	49.378
		87.91	62.317
		87.827	57.228
		90.763	59.323
		81.402	61.19
		81.646	64.517
		76.137	57.869
		85.325	64.751
		89.135	49.246
		88.134	62.239
	Mean	85.56	58.81
	Std. Deviation	4.491	5.594

## Sheet: 4C
		pha-4 mRNA level
		N2
		EV	tax-6 RNAi
		1	8.43635
		1	9.13109
		1	8.80906
	Mean	1	8.792
	Std. Deviation	0	0.3477

## Sheet: 4D
	Experiment #	Strain	Genotype	RNAi	Mean survival	# Deaths/total before censoring	Control for comparison	p value with respect to control	% Survival extension (compared to control)
	1	DA465	eat-2(ad465)	EV	23.34	85/86
		DA465	eat-2(ad465)	tax-6	22.4	97/97	EV	0.0037	-4
	2	DA465	eat-2(ad465)	EV	22.5	85/86
		DA465	eat-2(ad465)	tax-6	22	91/91	EV	0.0181	-2.22
	3	DA465	eat-2(ad465)	EV	22.3	90/92
		DA465	eat-2(ad465)	tax-6	22.3	95/96	EV	0.3897	0

## Sheet: 4E
	Experiment #	Strain	Genotype	Mean survival	# Deaths/total before censoring	Control for comparison	p value with respect to control	% Survival extension (compared to control)	Remarks
	1	N2	Wild type	12.8	90/90
		RB1667	tax-6(ok2065)	21	94/94	N2	<0.0001	64.06	Common with Figure 1F
		DA465	eat-2(ad456)	18.8	107/107	N2	<0.0001	46.87
			eat-2(ad456);tax-6(ok2065)	22.6	88/88	N2	<0.0001	76.56
	2	N2	Wild type	14.5	108/108
		RB1667	tax-6(ok2065)	20.7	86/86	N2	<0.0001	42.75	Common with Figure 1F
		DA465	eat-2(ad456)	18.6	81/81	N2	<0.0001	28.27
			eat-2(ad456);tax-6(ok2065)	22.2	95/95	N2	<0.0001	53.1
	3	N2	Wild type	13.7	120/120
		RB1667	tax-6(ok2065)	28.3	93/93	N2	<0.0001	106.5	Common with Figure 1F
		DA465	eat-2(ad456)	20.17	74/74	N2	<0.0001	47.22
			eat-2(ad456);tax-6(ok2065)	25.9	68/68	N2	<0.0001	89.05

## Sheet: 4F
	Experiment #	Strain	Genotype	RNAi	Mean survival	# Deaths/total before censoring	Control for comparison	p value with respect to control	% Survival extension (compared to control)
	1	RB754	aak-2(ok524)	EV	9	65/93
		RB754	aak-2(ok524)	tax-6	12.8	91/100	EV	<0.0001	42.22
	2	RB754	aak-2(ok524)	EV	9.2	72/94
		RB754	aak-2(ok524)	tax-6	12.8	97/105	EV	<0.0001	39.13
	3	RB754	aak-2(ok524)	EV	9.37	75/100
		RB754	aak-2(ok524)	tax-6	13.4	104/116	EV	<0.0001	43

## Sheet: 4G
	Experiment #	Strain	Genotype	RNAi	Mean survival	# Deaths/total before censoring	Control for comparison	p value with respect to control	% Survival extension (compared to control)
	1	VC222	raga-1(ok386)	EV	16.77	58/102
		VC222	raga-1(ok386)	tax-6	28.45	89/103	EV	<0.0001	69.65
	2	VC222	raga-1(ok386)	EV	16.32	57/106
		VC222	raga-1(ok386)	tax-6	30.57	92/100	EV	<0.0001	87.31
	3	VC222	raga-1(ok386)	EV	16	58/104
		VC222	raga-1(ok386)	tax-6	27.7	94/106	EV	<0.0001	73.12

## Sheet: 4H
	Experiment #	Strain	Genotype	RNAi	Mean survival	# Deaths/total before censoring	Control for comparison	p value with respect to control	% Survival extension (compared to control)
	1	RB1206	rsks-1(ok1255)	EV	15.8	80/92
		RB1206	rsks-1(ok1255)	tax-6	26.25	89/100	EV	<0.0001	66.13
	2	RB1206	rsks-1(ok1255)	EV	15.9	84/91
		RB1206	rsks-1(ok1255)	tax-6	26.5	84/96	EV	<0.0001	66.6
	3	RB1206	rsks-1(ok1255)	EV	15.7	88/90
		RB1206	rsks-1(ok1255)	tax-6	28	65/85	EV	<0.0001	78.34

## Sheet: 4I
	Experiment #	Strain	Genotype	RNAi	Mean survival	# Deaths/total before censoring	Control for comparison	p value with respect to control	% Survival extension (compared to control)
	1	CF1038	daf-16(mu86)	EV	11.17	95/104
		CF1038	daf-16(mu86)	tax-6	18.33	108/108	EV	<0.0001	64.1
	2	CF1038	daf-16(mu86)	EV	10.7	94/103
		CF1038	daf-16(mu86)	tax-6	16.5	102/103	EV	<0.0001	54.2
	3	CF1038	daf-16(mu86)	EV	10.5	90/107
		CF1038	daf-16(mu86)	tax-6	17.4	107/109	EV	<0.0001	65.71

## Sheet: 4J
	Experiment #	Strain	Genotype	RNAi	Mean survival	# Deaths/total before censoring	Control for comparison	p value with respect to control	% Survival extension (compared to control)
	1	STE68	nhr-49(nr2041)	EV	7.76	47/64
		STE68	nhr-49(nr2041)	tax-6	12.4	59/95	EV	<0.0001	59.79
	2	STE68	nhr-49(nr2041)	EV	7.12	68/84
		STE68	nhr-49(nr2041)	tax-6	13.84	59/68	EV	<0.0001	94.38
	3	STE68	nhr-49(nr2041)	EV	6.8	74/81
		STE68	nhr-49(nr2041)	tax-6	12.68	77/92	EV	<0.0001	86.47
