# Supplementary material for: Calcineurin inhibition enhances Caenorhabditis elegans lifespan by defecation defects-mediated calorie restriction and nuclear hormone signaling
Source: eLife. 2024 Nov 1;12:RP89572. doi: 10.7554/eLife.89572 (PMC11530235; doi:10.7554/eLife.89572)
Supplement: Figure 5—figure supplement 2—source data 1. [file elife-89572-fig5-figsupp2-data1.xlsx]

## Sheet: Fig 5_S2_A
		Number of expulsions/20 minutes
		hlh-30(tm1978)
		EV	tax-6 RNAi
		21	6
		16	1
		17	0
		17	3
		14	7
	Mean	17	3.4
	Std. Deviation	2.55	3.05

## Sheet: Fig 5_S2_C
		Lumen diameter (μm)
		hlh-30(tm1978)
		EV	tax-6 RNAi
		14.733	29.364
		8.565	29.365
		8.652	38.106
		10.943	30.8
		6.118	37.948
		8.652	29.995
		6.921	31.835
		6.118	33.035
		11.079	33.125
		14.733	30.588
		15.9	32.116
		9.864	41.617
		8.565	29.567
	Mean	10.06	32.88
	Std. Deviation	3.279	3.923

## Sheet: Fig 5_S2_D
	Number of expulsions/20 minutes
	nhr-8(ok186)
	EV	tax-6 RNAi
	20	0
	20	6
	20	5
	21	6
	15	1
	15	0
