# Supplementary material for: Calcineurin inhibition enhances Caenorhabditis elegans lifespan by defecation defects-mediated calorie restriction and nuclear hormone signaling
Source: eLife. 2024 Nov 1;12:RP89572. doi: 10.7554/eLife.89572 (PMC11530235; doi:10.7554/eLife.89572)
Supplement: Figure 5—source data 1. [file elife-89572-fig5-data1.xlsx]

## Sheet: 5A
	Experiment #	Strain	Genotype	RNAi	Mean survival	# Deaths/total before censoring	Control for comparison	p value with respect to control	% Survival extension (compared to control)
	1	JIN1375	hlh-30(tm1978)	EV	11.3	94/94
		JIN1375	hlh-30(tm1978)	tax-6	11.4	102/102	EV	0.0087	0.88
		JIN1375	hlh-30(tm1978)	flr-1	12.36	77/77	EV	<0.0001	9.38
		JIN1375	hlh-30(tm1978)	pbo-1	10.97	61/61	EV	0.173	-2.9
		JIN1375	hlh-30(tm1978)	nhx-2	14.3	86/86	EV	<0.0001	26.54
	2	JIN1375	hlh-30(tm1978)	EV	11.1	97/97
		JIN1375	hlh-30(tm1978)	tax-6	11.5	84/84	EV	0.0018	3.6
		JIN1375	hlh-30(tm1978)	flr-1	10.5	60/60	EV	0.2752	-5.4
		JIN1375	hlh-30(tm1978)	pbo-1	10.97	80/80	EV	0.0354	-1.1
		JIN1375	hlh-30(tm1978)	nhx-2	13.92	98/98	EV	<0.0001	25.4
	3	JIN1375	hlh-30(tm1978)	EV	11.3	94/94
		JIN1375	hlh-30(tm1978)	tax-6	14	99/99	EV	<0.0001	23.89
		JIN1375	hlh-30(tm1978)	flr-1	11.13	64/64	EV	0.251	-1.5
		JIN1375	hlh-30(tm1978)	pbo-1	11.8	76/76	EV	0.0066	4.42
		JIN1375	hlh-30(tm1978)	nhx-2	12.15	73/73	EV	<0.0001	7.52

## Sheet: 5C
		Oil-Red-O intensity/animal
		hlh-30(tm1978)
	EV	tax-6 RNAi	flr-1 RNAi	pbo-1 RNAi	nhx-2 RNAi
	87.695	88.511	50.548	60.631	62.193
	107.645	76.939	42.084	43.26	63.789
	111.014	81.331	51.215	49.656	65.269
	104.813	87.069	58.503	48.071	58.632
	105.553	88.565	50.637	50.08	62.052
	104.551	98.518	48.588	51.269	67.445
	110.855	84.984	36.89	46.588	60.026
	108.224	81.271	45.429	40.054	60.853
	96.114	88.042	62.952	62.929	63.683
	102.241	76.759	44.736	38.393	62.132
	92.235	74.79	57.675	54.384	52.944
	97.243	72.639	36.714	40.498	57.207
	98.532	70.289	54.67	50.135	57.681
	84.856	77.928	46.761	32.723	50.167
	89.979	76.533	37.876	51.753	45.624
	83.925	77.389	88.59	46.226	41.927
	86.972	68.202	91.176	41.625	43.946
	93.031	76.126	46.177	44.239	59.171
	104.37	74.608	42.553	40.438	63.361
	95.708	74.167	43.497	31.888	52.307
Mean	98.28	79.73	51.86	46.24	57.52
Std. Deviation	8.784	7.491	14.81	8.085	7.349

## Sheet: 5D
	Experiment #	Strain	Genotype	RNAi	Mean survival	# Deaths/total before censoring	Control for comparison	p value with respect to control	% Survival extension (compared to control)
	1	AE501	nhr-8(ok186)	EV	14	61/89
		AE502	nhr-8(ok186)	tax-6	14	92/93	EV	0.7619	0
		AE503	nhr-8(ok186)	flr-1	15.9	76/89	EV	0.0017	13.57
		AE504	nhr-8(ok186)	pbo-1	14	85/86	EV	0.424	0
		AE505	nhr-8(ok186)	nhx-2	13	85/87	EV	0.0068	-7.1
	2	AE501	nhr-8(ok186)	EV	14.47	76/89
		AE502	nhr-8(ok186)	tax-6	14.47	90/91	EV	0.9206	0
		AE503	nhr-8(ok186)	flr-1	15.1	81/89	EV	0.1476	4.35
		AE504	nhr-8(ok186)	pbo-1	14.47	91/92	EV	0.1798	0
		AE505	nhr-8(ok186)	nhx-2	13.66	88/89	EV	0.0129	-5.5
	3	AE501	nhr-8(ok186)	EV	14.63	70/90
		AE502	nhr-8(ok186)	tax-6	14.29	93/96	EV	0.7279	-2.3
		AE503	nhr-8(ok186)	flr-1	15.26	82/90	EV	0.0443	4.3
		AE504	nhr-8(ok186)	pbo-1	14.1	99/101	EV	0.1345	-3.6
		AE505	nhr-8(ok186)	nhx-2	13.7	85/87	EV	0.0174	-6.3

## Sheet: 5E
	Experiment #	Strain	Genotype	RNAi	Mean survival	# Deaths/total before censoring	Control for comparison	p value with respect to control	% Survival extension (compared to control)
	1	RG1228	daf-9(rh50)	EV	13.36	47/80
		RG1228	daf-9(rh50)	tax-6	22.44	91/93	EV	<0.0001	67.96
	2	RG1228	daf-9(rh50)	EV	13.63	44/85
		RG1228	daf-9(rh50)	tax-6	22.52	97/104	EV	<0.0001	65.22
	3	RG1228	daf-9(rh50)	EV	13.8	45/92
		RG1228	daf-9(rh50)	tax-6	21.15	97/101	EV	<0.0001	53.26

## Sheet: 5G
		Oil-Red-O intensity/animal
		nhr-8(ok186)
	EV	tax-6 RNAi	flr-1 RNAi	pbo-1 RNAi	nhx-2 RNAi
	114.248	57.355	31.801	39.056	83.869
	108.837	63.763	25.656	39.984	81.148
	116.265	52.969	31.469	36.634	72.982
	118.603	61.879	36.891	41.01	83.453
	115.849	89.465	32.126	39.405	65.502
	103.402	41.286	32.968	28.602	88.328
	115.032	49.957	40.126	40.876	67.887
	114.342	39.359	39.156	34.249	67.317
	106.782	46.656	32.497	41.287	68.188
	116.576	46.416	24.193	40.525	83.529
	71.892	53.369	33.654	29.022	69.117
	100.769	47.02	33.895	27.406	62.003
	83.73	49.966	31.66	30.813	59.265
	79.012	41.833	39.084	28.138	43.889
	68.972	46.18	28.11	30.188	55.62
	86.131	46.011	34.685	33.867	64.304
	87.172	54.15	35.36	35.795	62.401
	78.932	45.269	24.386	30.851	56.947
	74.283	50.971	24.491	40.826	50.19
	93.442	53.882	34.967	33.798	51.175
Mean	97.71	51.89	32.36	35.12	66.86
Std. Deviation	17.42	10.92	4.892	5.031	12.44

## Sheet: 5H
		nhr-8 mRNA level
		N2
		EV	tax-6 RNAi	flr-1 RNAi	nhx-2 RNAi	pbo-1 RNAi
		1	6.72835	4.59407	6.64054	5.84182
		1	7.11077	7.44401	11.1206	5.25908
		1	8.014	5.05331	11.406	5.06103
	Mean	1	7.284	5.697	9.722	5.387
	Std. Deviation	0	0.6602	1.53	2.673	0.4059
