# Supplementary material for: Calcineurin inhibition enhances Caenorhabditis elegans lifespan by defecation defects-mediated calorie restriction and nuclear hormone signaling
Source: eLife. 2024 Nov 1;12:RP89572. doi: 10.7554/eLife.89572 (PMC11530235; doi:10.7554/eLife.89572)
Supplement: Figure 6—source data 1. [file elife-89572-fig6-data1.xlsx]

## Sheet: 6A
	Experiment #	Strain	Genotype	RNAi	Mean survival	# Deaths/total before censoring	Control for comparison	p value with respect to control	% Survival extension (compared to control)
	1	JIN1375	hlh-30(tm1978)	EV	38.26	84/94
		JIN1375	hlh-30(tm1978)	tax-6	24.1	82/91	EV	<0.0001	-37
	2	JIN1375	hlh-30(tm1978)	EV	33.4	73/89
		JIN1375	hlh-30(tm1978)	tax-6	19.36	88/91	EV	<0.0001	-42
	3	JIN1375	hlh-30(tm1978)	EV	38.7	85/94
		JIN1375	hlh-30(tm1978)	tax-6	21	88/92	EV	<0.0001	-45.73

## Sheet: 6B
	Experiment #	Strain	Genotype	RNAi	Mean survival	# Deaths/total before censoring	Control for comparison	p value with respect to control	% Survival extension (compared to control)
	1	AE501	nhr-8(ok186)	EV	45.1	88/91
		AE501	nhr-8(ok186)	tax-6	31.3	96/96	EV	<0.0001	-30.59
	2	AE501	nhr-8(ok186)	EV	40.213	86/90
		AE501	nhr-8(ok186)	tax-6	22.56	90/90	EV	<0.0001	-43.89
	3	AE501	nhr-8(ok186)	EV	42.94	88/90
		AE501	nhr-8(ok186)	tax-6	25	86/90	EV	<0.0001	-41.77
